# Supplementary material
Source: PubMed Central journal article supplement (PMC7755755)

### HLC-women

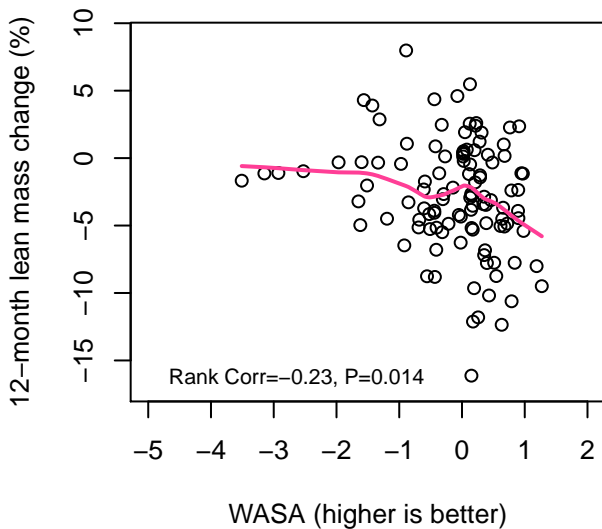

### HLC-men

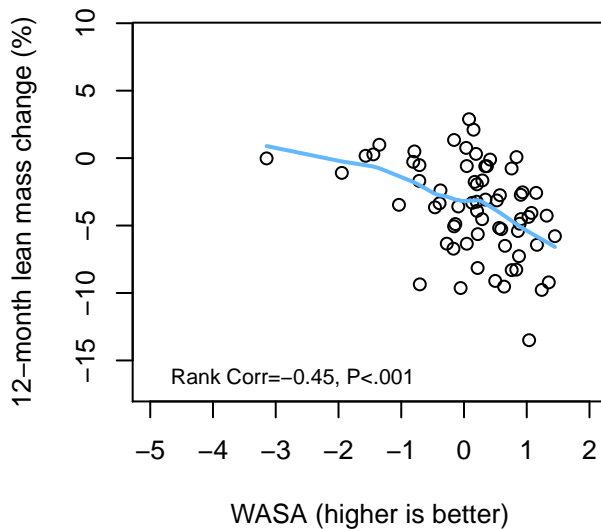

### HLF-women

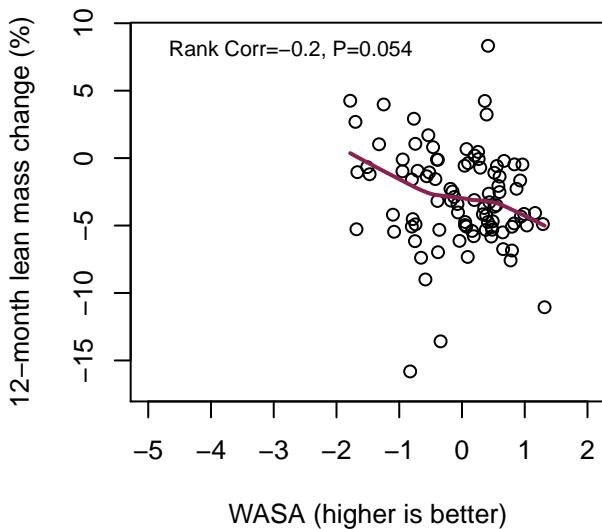

### HLF-men

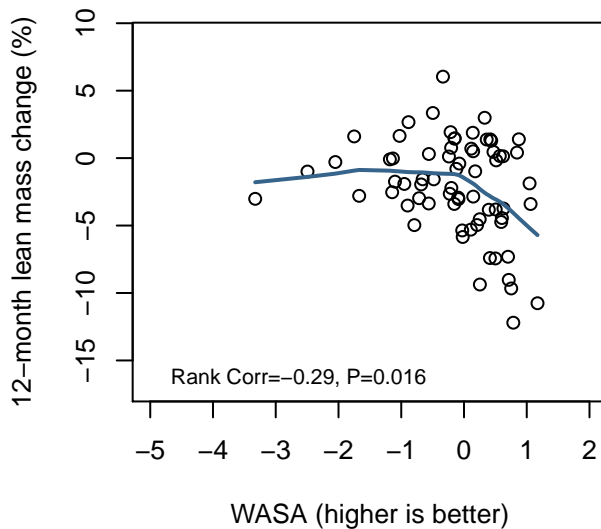

Supplement: NIHMS1642430-supplement-4.pdf [file NIHMS1642430-supplement-4.pdf]
